1 **Determinants for forming a supramolecular myelin-like proteolipid lattice**

2

3 Salla Ruskamo<sup>1,2,§</sup>, Oda C. Krokengen<sup>3,§</sup>, Julia Kowal<sup>4,#</sup>, Tuomo Nieminen<sup>5,#</sup>, Mari  
4 Lehtimäki<sup>1,#</sup>, Arne Raasakka<sup>3</sup>, Venkata P. Dandey<sup>4,#</sup>, Ipo Vattulainen<sup>5,6</sup>, Henning Stahlberg<sup>4</sup>,  
5 Petri Kursula<sup>1,2,3,\*</sup>

6

7 <sup>1</sup>Faculty of Biochemistry and Molecular Medicine, University of Oulu, Oulu, Finland

8 <sup>2</sup>Biocenter Oulu, University of Oulu, Oulu, Finland

9 <sup>3</sup>Department of Biomedicine, University of Bergen, Bergen, Norway

10 <sup>4</sup>Center for Cellular Imaging and NanoAnalytics (C-CINA), Biozentrum, University of Basel,  
11 Basel, Switzerland

12 <sup>5</sup>Computational Physics Laboratory, Tampere University, Tampere, Finland

13 <sup>6</sup>Department of Physics, University of Helsinki, Helsinki, Finland

14

15 § equal contribution

16 \* corresponding author; [petri.kursula@uib.no](mailto:petri.kursula@uib.no)

17

18 # Current addresses:

19 J.K.; Institute of Molecular Biology and Biophysics, ETH Zurich, Switzerland.

20 T.N.; Tampere University of Applied Sciences, Tampere, Finland

21 M.L.; FDA, Rockville, MD, USA

22 V.P.D.; The National Resource for Automated Molecular Microscopy, Simons Electron  
23 Microscopy Center, New York Structural Biology Center, New York, NY, USA.

24

25

26

27

28

29

1    **Abstract**

2    Myelin protein P2 is a peripheral membrane protein of the fatty acid binding protein family.  
3    It functions in the formation and maintenance of the peripheral nerve myelin sheath, and  
4    several P2 mutations causing human Charot-Marie-Tooth neuropathy have been reported.  
5    Here, electron cryomicroscopy of myelin-like proteolipid multilayers revealed a  
6    three-dimensionally ordered lattice of P2 molecules between stacked lipid bilayers,  
7    visualizing its possible assembly at the myelin major dense line. A single layer of P2 is  
8    inserted between two bilayers in a tight intermembrane space of ~3 nm, implying direct  
9    interactions between P2 and two membrane surfaces. Further details on lateral protein  
10   organization were revealed through X-ray diffraction from bicelles stacked by P2. Surface  
11   mutagenesis of P2 coupled to structural and functional experiments revealed a role for both  
12   the portal region and the opposite face of P2 in membrane interactions. Atomistic molecular  
13   dynamics simulations of P2 on myelin-like and model membrane surfaces suggested that  
14   Arg88 is an important residue for P2-membrane interactions, in addition to the helical lid  
15   domain on the opposite face of the molecule. Negatively charged myelin lipid headgroups  
16   anchor P2 stably on the bilayer surface. Membrane binding may be accompanied by opening  
17   of the P2  $\beta$  barrel structure and ligand exchange with the apposing lipid bilayer. Our results  
18   provide an unprecedented view into an ordered, multilayered biomolecular membrane system  
19   induced by the presence of a peripheral membrane protein from human myelin. This is an  
20   important step towards deciphering the 3-dimensional assembly of a mature myelin sheath at  
21   the molecular level.

22

23

## 1 **Introduction**

2 A central question in myelin biology is the molecular mechanism of the tight packing of  
3 dozens of apposing lipid bilayers into a mature, multilayered myelin sheath. A major role in  
4 this process is played by myelin-specific proteins. The high degree of order within the myelin  
5 sheath has been known since early experiments using X-ray diffraction <sup>1</sup>; however, the details  
6 of the molecular assembly have remained enigmatic.

7 The spontaneous formation of lipid membrane multilayers is a common functional property  
8 of different myelin-specific proteins, which are not genetically related. In peripheral nervous  
9 system (PNS) myelin, the compact multilamellar membrane contains only a few proteins.  
10 The intrinsically disordered myelin basic protein (MBP) is irreversibly embedded into a  
11 single leaflet of the lipid bilayer <sup>2</sup>. The cytoplasmic domain of myelin protein zero (P0)  
12 behaves much like MBP, although it embeds deeper into the membrane <sup>3</sup>. Full-length P0  
13 promotes membrane stacking through both extra- and intracellular interactions <sup>3-6</sup>. Peripheral  
14 myelin protein 22 (PMP22), another PNS integral membrane protein, forms myelin-like  
15 assemblies <sup>7</sup>, much like those observed with MBP and P0. P2 adheres to the cytoplasmic  
16 leaflet of the bilayer and can be classified as a peripheral membrane protein <sup>8</sup>.

17 Peripheral membrane proteins associate with cellular membranes *via* diverse mechanisms.  
18 Membrane binding may be either irreversible, mediated by post-translational modifications  
19 (palmitoylation, myristoylation, or prenylation), or reversible with variable binding affinities.  
20 The specificity of protein-membrane interactions is affected by the physical properties of the  
21 protein and the lipid bilayer, such as surface charge or membrane curvature. Many peripheral  
22 membrane proteins utilize amphipathic helices or hydrophobic amino acids that penetrate into  
23 the hydrophobic bilayer core to form stable interactions with membranes <sup>9</sup>.

24 P2 is a Schwann cell-specific protein expressed in the PNS myelin of tetrapods <sup>10</sup>.  
25 Intriguingly, P2 is expressed in a mosaic fashion, not being present in all myelin sheaths <sup>11,12</sup>.  
26 This small  $\beta$ -barrel protein belongs to the family of fatty acid binding proteins (FABPs). The  
27 bound fatty acid is enclosed inside the  $\beta$  barrel by a lid formed by two adjacent  $\alpha$  helices  
28 <sup>13-15</sup>; the opening of the  $\beta$  barrel may be of importance in fatty acid entry and egress <sup>13</sup>. In  
29 addition to fatty acid binding, P2 can transfer lipids from/to membranes using a collisional  
30 transfer mechanism <sup>16</sup>, as seen with several other FABPs <sup>17-21</sup>. Besides fatty acids, P2 may  
31 bind cholesterol <sup>14</sup>, which is abundant in the myelin membrane and essential for myelination  
32 <sup>22</sup>. The tip of the  $\alpha$ -helical lid is hydrophobic, while both ends of the  $\beta$  barrel present  
33 positively charged surfaces <sup>14,15</sup>, and these properties are likely important, when P2 stacks  
34 between two phospholipid bilayers.

1 Studies on P2-deficient mice revealed temporarily reduced motor nerve conduction velocity  
2 and altered lipid composition in PNS myelin. However, the overall PNS myelin structure  
3 remained normal <sup>16</sup>. Further analyses on the mutant mice revealed that P2 has a role in  
4 remyelination of an injured PNS <sup>23</sup> and melanoma cell invasion <sup>24</sup>. Five Charcot-Marie-Tooth  
5 1 (CMT1) disease point mutations in human P2 have been discovered <sup>25-29</sup>. Three  
6 CMT1-associated P2 protein variants have been characterized at the molecular level, showing  
7 altered fatty acid and lipid membrane binding properties. The most drastic CMT1 mutation,  
8 T51P, also reduced the membrane stacking capability of P2 <sup>30</sup>. Overall, the stability of the  
9 mutant proteins was decreased, even though crystal structures indicated only minor structural  
10 changes compared to wild-type P2.

11 In the current study, we incorporated human P2 into a model membrane multilayer system  
12 and visualized the myelin-like proteolipid structures using electron cryomicroscopy  
13 (cryo-EM). P2-bicelle complexes were used for additional structural insights. We produced  
14 mutated forms of P2 to establish determinants of lipid bilayer and fatty acid binding and used  
15 atomistic molecular dynamics (MD) simulations to visualize the intimate interaction between  
16 P2 and a myelin bilayer. We show the spontaneous formation of an ordered, crystal-like  
17 lattice of P2 bound inside membrane multilayers and highlight factors that are important in  
18 this process, which involves a conformational change in the protein. The results provide a  
19 glimpse into the self-assembling properties of myelin proteins and lipid membranes, which  
20 are likely to be crucial for correct myelination in the vertebrate nervous system.

21

22

## 1 **Materials and methods**

### 2 **Protein production**

3 The expression and purification of human wild-type P2 (wtP2) was done as described <sup>14</sup>.  
4 Mutagenesis and the expression and purification of P2 variants were described earlier <sup>31</sup>.

### 5 **Electron cryomicroscopy and image processing**

6 0.6 mg/ml of purified wtP2 or the P38G variant were mixed with *E. coli* polar lipids (Avanti  
7 Polar Lipids) using a lipid:protein ratio of 2 (w/w), corresponding to a molar ratio of ~40, and  
8 incubated for 1-2 h at +23 °C. For grid preparation, samples were applied to  
9 glow-discharged, holey carbon grids (QUANTIFOIL R 1.2/1.3, R 2/2 or R 3.5/1). 3- $\mu$ l  
10 samples were adsorbed for 1 min at +20 °C, 90% humidity. Grids were then blotted for 2 s  
11 and vitrified by plunging into liquid nitrogen-cooled liquid ethane using an FEI Vitrobot  
12 MK4 (Vitrobot, Maastricht Instruments). The frozen grids were imaged using FEI Titan  
13 Krios TEM operated at 300 keV. Images were recorded using a Gatan K2 Summit direct  
14 electron detector, in counting mode (0.2 sec/frame, 8 sec in total, 6-7 e/pix/sec). Movie  
15 frames were aligned with MotionCorr <sup>32</sup> and preprocessed by 2dx\_automator <sup>33</sup>. The effective  
16 pixel size of the images was 1.3 Å/pixel. Particles were boxed with EMAN2 (Helixboxer) <sup>34</sup>  
17 and further processed by Spring <sup>35</sup> with helical reconstruction. In total, 25 000 overlapping  
18 and CTF-corrected segments with the size of 240 x 240 pixels were used with a binning value  
19 of 2 to calculate 2D class averages.

### 20 **Structural analysis of P2-stacked bicelles**

21 0.5 mg/ml P2 was mixed with 0.5 mg/ml bicelles (phospholipid:dodecylphosphocholine  
22 (DPC) ratio 2.85, phospholipids 1:1 dimyristoylphosphatidylcholine  
23 (DMPC):dimyristoylphosphatidylglycerol (DMPG) and incubated for 1 h at room  
24 temperature. 4- $\mu$ l samples were then pipetted onto glow-discharged carbon-coated copper  
25 grids before incubating for 1 min. Excess solution was removed with filter paper (Whatman),  
26 and the samples were washed with 4 drops of Milli-Q water. Samples were stained with two  
27 drops of 2% uranyl acetate for 12 s in each drop and air-dried. Transmission electron  
28 microscopy (TEM) was performed using a Jeol JEM-1230 (MedWOW) instrument.

29 To examine repetitive structures in turbid samples, 2, 10, and 20  $\mu$ M P2 was mixed with 1, 2,  
30 or 3 mM bicelles in 20 mM HEPES (pH 7.5), 150 mM NaCl. Samples were prepared at  
31 ambient temperature right before the measurements and measured at +25 °C. Synchrotron  
32 SAXS data from the suspensions were collected at the PETRA III storage ring, DESY,  
33 Hamburg, Germany on the EMBL beamline P12 <sup>36</sup>. Data were processed and analysed using  
34 ATSAS <sup>37</sup>. Repeat distances in the sample were deduced from Bragg peak positions.

## 1 **Crystal structure determination**

2 All P2 variants were crystallized and X-ray diffraction data collected as described<sup>31</sup>. Data  
3 were processed with XDS<sup>38,39</sup>, and molecular replacement was done using Phaser<sup>40</sup> using  
4 human wtP2 (PDB code 2WUT)<sup>14</sup> as a search model. Structures were refined with  
5 phenix.refine<sup>41</sup>, and rebuilding was done in Coot<sup>42</sup>. The structures were validated using  
6 MolProbity<sup>43</sup>. The refined coordinates and structure factors were deposited at the PDB (see  
7 Supplementary Table 1 for statistics and entry codes).

## 8 **Proteolipid vesicle aggregation**

9 5  $\mu$ M of each P2 mutant was mixed with DMPC:DMPG (1:1) vesicles in a buffer containing  
10 10 mM HEPES (pH 7.4), 150 mM NaCl and incubated for 10 min at room temperature.  
11 Lysozyme and BSA were used as negative controls. Turbidity was measured on a Tecan  
12 Infinite M200 plate reader at 450 nm. The turbidity values were plotted as relative turbidity  
13 compared to wtP2 from the same measurement series. For further characterization, the turbid  
14 samples were centrifuged and the supernatant and pellet fractions analyzed by SDS-PAGE, in  
15 order to detect cosedimentation of P2 with aggregated vesicles.

16 Turbidity was also studied with protein-bicelle complexes, using wtP2. For this purpose,  
17 bicelles (phospholipid/detergent ratio 2.85) were prepared as above, but the phospholipid  
18 composition was varied. Bicelles were at 5 mM and P2 at 33  $\mu$ M. wtP2 was simultaneously  
19 used to examine the effect of phospholipid vesicle composition on protein-induced turbidity;  
20 the lipid concentration was 0.5 mM. Turbidity was measured using a Tecan Spark 20M  
21 microplate reader at +30 °C.

## 22 **Surface plasmon resonance**

23 Surface plasmon resonance (SPR) was used to determine the effect of mutations on P2 to the  
24 binding of the protein to lipid monolayers using the Biacore T100 SPR instrument. Lipid  
25 monolayers consisting of either DMPC or dimyristoyl phosphatidic acid (DMPA) were  
26 immobilized on an HPA chip (GE Healthcare) according to the manufacturer's instructions.  
27 P2 at 1.0  $\mu$ M was injected onto the chip at +25 °C using 10 mM HEPES (pH 7.4), 150 mM  
28 NaCl as running buffer.

## 29 **Circular dichroism spectroscopy**

30 Circular dichroism (CD) spectra were measured in 10 mM sodium phosphate (pH 7.0) at a  
31 protein concentration of 0.1 mg/ml, using quartz cuvettes with 0.1-cm pathlength and a Jasco  
32 J-715 spectropolarimeter. Melting curves were measured using 0.2 mg/ml protein at 217 nm.  
33 The temperature was increased 1 °C/min from +20 °C to +90 °C.

1 Synchrotron radiation CD (SRCD) measurements for selected variants were performed on the  
2 CD1 beamline of the ASTRID storage ring at the ISA synchrotron (Aarhus, Denmark). Scans  
3 from 280 to 165 nm were performed in 1-nm steps at +20 °C in H<sub>2</sub>O. Three mutants with  
4 large effects on membrane binding (L27D, R30Q, and P38G), were studied in a bicelle  
5 environment (4:1 DMPC/DPC).

6 Bicelles and vesicles with varying phospholipid compositions were used for further SRCD  
7 experiments with wtP2. 0.4 mg/ml wtP2 was mixed with 5 mM bicelles or 2.65 mM vesicles.  
8 Spectra were recorded from 280 to 170 nm at +30 °C, using a 100- $\mu$ m cuvette. These  
9 experiments were performed on the AU-CD beamline of the ASTRID2 storage ring at the  
10 ISA synchrotron (Aarhus, Denmark)

### 11 **Fluorescence spectroscopy**

12 The fluorescent fatty acid 11-dansylamino-undecanoic acid (DAUDA) was used to study  
13 fatty acid binding by P2. DAUDA has been used to study ligand binding in FABPs before  
14 <sup>44,45</sup>. DAUDA was dissolved in DMSO, and the final DMSO concentration in the samples  
15 was 1%. 20  $\mu$ M DAUDA was mixed with 0, 1, 5, or 10  $\mu$ M protein. Samples were incubated  
16 for 2 h at +23 °C. Fluorescence excitation at 280 nm was used and emission was recorded at  
17 530 nm using a Tecan Infinite M200 plate reader.

18 The binding of wtP2 and the P38G mutant to cholesterol was studied using the  
19 environment-sensitive fluorescent cholesterol analogue  
20 22-(N-(7-nitrobenz-2-oxa-1,3-diazol-4-yl)amino)-23,24-bisnor-5-cholen-3 $\beta$ -ol  
21 (22-NBD-cholesterol). The fluorescence intensity of 22-NBD-cholesterol increases and the  
22 fluorescence emission maximum shifts, if the probe is moved to a non-polar environment.  
23 100  $\mu$ M 22-NBD-cholesterol stock solution was prepared in 100% ethanol, and the maximum  
24 ethanol concentration in the sample was 2%. All experiments were carried out in 10 mM  
25 HEPES (pH 7.5). 2  $\mu$ M 22-NBD-cholesterol was incubated for 16 h at +23 °C with varying  
26 amounts of P2. Fluorescence spectra were recorded on a Horiba Fluoromax-4 instrument,  
27 using excitation at 473 nm and emission between 500-600 nm, with a bandwidth of 5 nm.

### 28 **Atomic scale molecular dynamics simulations**

29 Structures of wtP2 and P38G were prepared for the simulations essentially as described  
30 elsewhere <sup>46</sup>. Briefly, the P2 structure with bound palmitate was taken from the PDB entry  
31 4BVM <sup>15</sup> and converted to match an all-atom representation consistent with the CHARMM36  
32 force field <sup>47</sup>, which was used for simulating the system components, unless mentioned  
33 otherwise. The topology for wtP2 was directly obtained from this conversion. The P38G  
34 mutation was made *in silico* and equilibrated in a water environment. Both protein-palmitate

1 complexes had a total charge of +10.

2 Lipid bilayers were constructed using the CHARMM-GUI membrane builder<sup>48</sup>. Two  
3 different membrane systems were considered: a 1:1 DMPC:DMPG bilayer as a general  
4 reference with a net negative surface charge, and a myelin bilayer mimicking the cytoplasmic  
5 leaflet of the myelin membrane. The composition of the myelin-like bilayer was 44 mol-%  
6 cholesterol, 27 mol-% palmitoyloleoylphosphatidylethanolamine (POPE), 2 mol-%  
7 phosphatidylinositol-4,5-bisphosphate (PIP<sub>2</sub>), 11 mol-% palmitoyloleoylphosphatidylcholine  
8 (POPC), 13 mol-% palmitoyloleoylphosphatidylserine (POPS), and 3 mol-% sphingomyelin  
9<sup>49</sup>. The bilayers were symmetrical, comprised of a total of 200 lipid molecules each.

10 Ten Cl<sup>-</sup> ions were included to neutralize the total charge of each protein-palmitate complex.  
11 The systems were solvated with a total of 15000 water molecules each, with 0.1 M KCl.  
12 Water was modelled using the TIP3P model<sup>50</sup>. Additional counterions (90 K<sup>+</sup> in the  
13 DMPC:DMPG and 32 K<sup>+</sup> in the myelin membrane system) were included to neutralize the  
14 system total charge. The total system volume was approximately (7.5 x 7.5 x 12) nm<sup>3</sup> for the  
15 DMPC:DMPG and (6.5 x 6.5 x 13.5) nm<sup>3</sup> for the myelin membrane systems. Periodic  
16 boundary conditions were used to make the bilayer structure continuous.

17 Molecular dynamics (MD) simulations were carried out under NpT conditions. Temperature  
18 coupling was performed with the velocity-rescale method<sup>51</sup>, using separate thermostats for  
19 the protein, the bilayer, and the solvent. Reference temperatures were set at 310 K, with  
20 coupling time constants of 2.0 ps. Pressure coupling was done semi-isotropically with the  
21 Parrinello-Rahman barostat<sup>52</sup>, using reference pressures of 1.0 bar with coupling time  
22 constants of 2.0 ps and compressibility constants of 4.5 x 10<sup>-5</sup> bar<sup>-1</sup>.

23 All bonds were constrained with the LINCS algorithm<sup>53</sup>. Cut-off radii of 1.0 nm were  
24 introduced for the Coulombic and Lennard-Jones interactions, including the neighbour list.  
25 Long-range electrostatics were calculated using the particle-mesh Ewald method<sup>54</sup> with  
26 cubic interpolation and a spacing of 0.16 nm for the Fourier grid.

27 The simulation systems were built by adding the protein structure near the bilayer and  
28 solvating the system thereafter. After a short steepest-descent equilibration, the systems were  
29 simulated long enough for the protein to spontaneously come into close contact with the  
30 bilayer. This was used as the starting structure, after which the systems were simulated for 3  
31 μs each. A total of 4 full simulations were run (one for each protein-membrane combination),  
32 in addition to several shorter simulations on the P2 membrane attachment phase. The first  
33 500 ns of each simulation were removed as an equilibration period, and the final 2.5 μs were  
34 used for analyses. All simulations were conducted with GROMACS 4.6.7<sup>55</sup>, using the



- 1 CHARMM36 all-atom representation and a time step of 2 fs, saving the trajectory
- 2 coordinates every 50 ps.
- 3
- 4

## 1 **Results**

2 While the molecular composition of compact myelin is relatively simple, the arrangement of  
3 proteins within the membrane multilayers is to a large extent unknown. Here, we used the  
4 peripheral membrane protein P2 from the PNS myelin major dense line as a model system to  
5 study myelin-like membrane stack formation and structure. P2 interacts with lipid bilayers  
6 with high affinity<sup>13,15,56–58</sup>. We explored its membrane binding characteristics, determinants,  
7 and dynamics more closely. The results provide further information on the molecular details  
8 of the major dense line in PNS myelin, as well as on CMT disease mechanisms linked to  
9 mutations in P2.

### 10 **Arrangement of P2 in multilayered membrane stacks**

11 P2 spontaneously binds lipid membranes together, as reflected by earlier studies using  
12 turbidimetry, simulation, and X-ray diffraction<sup>15,57</sup>. However, the molecular details of this  
13 phenomenon and the resulting supramolecular structure have remained elusive. Cryo-EM was  
14 used to follow membrane stacking and ordering of proteolipid components in multilayers  
15 induced by P2.

16 P2 induced the formation of highly ordered lipid bilayer stacks, while without P2, only  
17 unilamellar vesicles were observed (Figure 1A,B). The angle between two separating bilayers  
18 at the edge of a tight apposition is consistently  $<60^\circ$  (Figure 1C). Although P2 is only 15  
19 kDa, it is visible in cryo-EM images as ordered rows of particles between two apposed  
20 membranes. Based on the calculated 2D class averages (Figure 1D-G), P2 evidently stabilizes  
21 the lipid membrane stacks and defines the spacing ( $\sim 3.0$  nm) between two bilayer surfaces.  
22 This myelin-like spacing between two apposing lipid bilayers is constant throughout the  
23 membrane stacks. Based on the P2 crystal structure<sup>14,15</sup>, the longest diameter of P2 is 4.5 nm,  
24 indicating that either some parts of the protein are buried within the bilayer, or P2 is turned  
25 on its side on the membrane. The repeat distance in the multilayer, containing a 4.5-nm  
26 bilayer and a single layer of P2 molecules, is 7.5 nm. This is shorter than the distance  
27 measured in solution with X-ray diffraction under more hydrated conditions, and close to the  
28 distance observed with MBP and the P0 cytoplasmic domain in diffraction experiments<sup>2,3,15</sup>.  
29 P2 molecules are located between the bilayers with a lateral spacing of 3.5 nm between  
30 monomers (Figure 1F), indicating lattice-like order between membranes. This order extends  
31 into neighbouring membrane layers, and P2 molecules between the bilayers are at least to  
32 some extent in register between consecutive layers (Figure 1G).

33 Cryo-EM was similarly carried out with the "hyperactive" P38G variant<sup>46</sup> mixed with lipids  
34 (Figure 1E). Neither the bilayer spacing nor protein-lipid organization altered in the presence

1 of the mutant. During sample preparation, P38G induced membrane aggregation/stacking  
2 faster than wtP2, and the turbidity effect was visible within 2-3 min (not shown), in line with  
3 earlier experiments <sup>46</sup>.

#### 4 **3-dimensional order in P2-bicelle complexes**

5 In order to obtain additional structural insight into P2-membrane complexes, P2 was studied  
6 in a bicelle environment. P2 induced turbidity in protein-bicelle suspensions, and EM  
7 imaging revealed stacked arrangements of bicelles in these samples (Figure 2A). Thus, X-ray  
8 diffraction was used to gain more information on repetitive structures. In addition to the  
9 Bragg peaks originating from membrane stacking repeats of ~7-8 nm, additional diffraction  
10 peaks were observed (Figure 2B,C) in samples with the highest lipid and protein  
11 concentrations. The corresponding distances are close to those expected from a lattice-like  
12 setup of P2 molecules between two membranes, as observed in cryo-EM. The distances can  
13 be used to deduce a possible lateral organization of P2 molecules in the membrane plane  
14 (Figure 2D).

15 The distances observed in the experiment changed as a function of P/L ratio. This behaviour  
16 is similar, but not identical, to that observed for the P0 cytoplasmic domain, which caused  
17 tighter membrane packing at high P/L ratios <sup>3</sup>. For P2, both the lipid and protein  
18 concentration affect the repeat distance in a concerted fashion (Figure 2C). The distances get  
19 shorter when lipid concentration increases, indicating an overall increase in order and tighter  
20 packing. On the other hand, at the same lipid concentration, shorter distances are observed  
21 with higher protein amounts. Hence, the protein and lipid components synergistically  
22 assemble into a compact, ordered, 3-dimensional proteolipid structure.

#### 23 **Design of point mutants**

24 In order to elucidate structure-function relationships in P2, as a general model for a FABP  
25 with a collisional mechanism and tight interaction with membranes, we used the crystal  
26 structure of human P2 to design mutations that might affect membrane binding (Figure 3A).  
27 The electrostatic surface of wtP2 shows two positively charged faces, at the helical lid  
28 domain and the bottom of the barrel structure (Figure 3B). The mutations can be roughly  
29 divided into three classes: those removing positive surface charge, those affecting the  
30 hydrophobic surface of helix  $\alpha_2$ , and other mutations possibly affecting the portal region.

#### 31 **Crystal structures of P2 variants**

32 For a high-resolution insight into the structure-function differences in the P2 variants, their  
33 respective crystal structures were solved (Supplementary Table 1, Figure 3C). None of the  
34 mutations affected folding or secondary structure elements in the crystal state. With respect

1 to this observation, it is important to note that the three studied CMT disease variants of P2  
2 crystallized like wtP2, even though their stability and function were impaired<sup>30</sup>. The RMS  
3 deviations of the mutant structures compared to wtP2 vary between 0.08 and 0.36 Å, P38G  
4 being the most divergent.

5 Prior to the current work, all crystal structures for wtP2 or mutant P2 contained a bound  
6 ligand inside the  $\beta$  barrel. The P38G structure refined here is the first exception: its internal  
7 cavity is clearly empty; no electron density for a bound fatty acid is present. This allows  
8 comparing details between liganded and unliganded P2 (Figure 3D). In our earlier study, the  
9 P38G mutant contained bound palmitate<sup>46</sup>. In the unliganded crystal structure of P38G, the  
10 amino acid side chains pointing inwards mainly retain their conformation. The main-chain  
11 hydrogen bond between residue 38 and Leu10 also exists in both P38G structures. However,  
12 helix  $\alpha 2$  at the portal region has slightly shifted outwards from helix  $\alpha 1$  in both chains; a  
13 similar change is observed in the R30Q mutant, which could be linked to altered  
14 membrane-binding properties (see below). In addition, P38G electron density is poor for  
15 residues 33-37 at the end of helix  $\alpha 2$  of chain B, supporting an increased flexibility/partial  
16 unfolding of the portal region in the P38G mutant in the absence of bound ligand, as seen in  
17 earlier simulations<sup>46</sup>. Phe57, as well as the whole  $\beta 4$ - $\beta 5$  loop of chain A, has somewhat tilted  
18 away from the  $\alpha 2$  helix.

19 All P2 structures excluding P38G have a fatty acid, modelled as a mixture of palmitate or  
20 *cis*-vaccinate in the atomic-resolution structures<sup>15,59</sup>, bound inside the  $\beta$  barrel. The  
21 conformation and position of the fatty acid is similar in most structures. In the K65Q mutant,  
22 the conformation of the palmitate is different, and Phe57 points outwards in all four chains in  
23 the asymmetric unit (Figure 3E). This supports the proposed role for Phe57 as a gatekeeper  
24 residue in the FABP family<sup>13,60</sup>.

25 All human P2 crystal structures published thus far have an anionic group bound in proximity  
26 of the hinge region; the identity of the ligand depends on crystallization conditions and  
27 crystal contacts. In wtP2, either chloride or citrate interacts with Thr56 and Lys37<sup>14,15</sup>. P38G  
28 and F57A contain chloride and sulfate, respectively<sup>13,46</sup>. In the CMT-associated P2 mutant  
29 structures, there is a malate located in the anion binding site<sup>30</sup>. In line with these data, all P2  
30 mutant structures solved here have an anionic group bound in the same pocket. These  
31 observations lend further support to the hypothesis that this pocket may be involved in  
32 recognizing phospholipid headgroups and initiating membrane binding and/or conformational  
33 change<sup>15</sup>.

34 **Membrane binding and multilayer stacking**

1 SPR was used to follow binding of the P2 variants onto immobilized lipid membranes, made  
2 of either DMPC or DMPA (Figure 4A). These membranes are net neutral and negatively  
3 charged, respectively. While MBP essentially binds to lipids irreversibly on SPR <sup>2</sup>, P2  
4 dissociates from the membrane rapidly <sup>15</sup>, suggesting different membrane interaction kinetics  
5 for the two proteins with overlapping function.

6 Four P2 mutants showed decreased binding to lipid membranes. One of these is L27D, which  
7 affects Leu27 at the tip of the helical lid and reduces the hydrophobicity of the portal region.  
8 The other three mutations with reduced binding affinity towards lipid membranes are found  
9 in adjacent loops on the opposite face, at the bottom of the  $\beta$  barrel. All these mutations  
10 (K45S, K65Q, and R88Q) affect surface residues and reduce the positive charge at the  
11 bottom of the  $\beta$  barrel. The locations of these mutations suggest two membrane binding  
12 surfaces on opposite faces of P2, in line with its packing between two bilayers *in vivo* and *in*  
13 *vitro*.

14 While some mutations caused diminished binding to the membrane surface, P38G and R30Q  
15 had increased levels of binding. These two mutations are located in the vicinity of the portal  
16 region and the helical lid domain. The difference in membrane binding of R30Q and P38G  
17 compared to wtP2 was more pronounced, when a DMPC membrane was studied.

18 Turbidimetry was used to assess the effectivity of P2 variants in aggregating DMPC:DMPG  
19 vesicles (Figure 4B). When the turbid proteolipid suspensions were centrifuged and analyzed  
20 by SDS-PAGE, P2 co-sedimented with aggregated vesicles, and the strong proteolipid  
21 complex was only partially solubilized by SDS; P2 was present as a ladder of oligomeric  
22 forms (Figure 4C). Again, P38G was the most effective variant, stacking vesicle membranes  
23 more than wtP2. Some mutations caused diminished turbidity compared to wtP2. The clearest  
24 of these were L27D and R88Q; the latter lies in the  $\beta$ 6- $\beta$ 7 loop - in the middle of a large  
25 positively charged surface patch at the bottom of the  $\beta$  barrel (Figure 4D). Hence, again,  
26 residues important for both membrane binding and stacking can be found on both positively  
27 charged faces of P2.

28 Another turbidimetric experiment was carried out to compare bicelles and vesicles in  
29 wtP2-induced multilayer formation. Like vesicles, bicelles are stacked by P2 into large  
30 structures causing turbidity (Figure 4E). Such ordered complexes could be a step towards  
31 higher-resolution structure determination of myelin proteolipid complexes, due to *e.g.*  
32 restrained particle size and geometry.

### 33 **Fatty acid and cholesterol binding**

34 Using the fluorescent fatty acid analogue DAUDA, we followed internal ligand binding to P2

1 variants (Figure 5A). The situation is complicated by the fact that tightly bound fatty acids  
2 co-purify with P2 from the expression host. Thus, a quantitative analysis was not performed,  
3 as increased binding could reflect either higher affinity or lower amounts of copurified  
4 ligand. However, the level of bound DAUDA should correlate with the opening of the portal  
5 region and/or the barrel, which is also required for removal of the bound fatty acid. Since  
6 bound fatty acid affects dynamics of P2<sup>13,46</sup>, it is likely that some of the mutated variants  
7 have different affinities towards fatty acids. Most mutant variants showed slightly higher  
8 DAUDA signal than wtP2, and P38G was the strongest binder of all variants.

9 We previously proposed cholesterol binding by P2<sup>14</sup>, in addition to fatty acids. Cholesterol  
10 binding was tested using wtP2 and P38G. wtP2 induced a clear, concentration-dependent  
11 change in the fluorescence spectrum of the environment-sensitive probe 22-NBD-cholesterol;  
12 the fluorescence maximum shifted towards shorter wavelengths and its intensity increased  
13 (Figure 5B,C). The spectral changes were more pronounced with P38G, which has a more  
14 flexible portal region<sup>46</sup>. The experiment shows that cholesterol, which is very abundant in  
15 myelin, could be a physiologically relevant ligand for P2. These assays together indicate that  
16 protein flexibility is important when P2 binds to its biological ligands.

### 17 **Folding and stability of point mutant variants**

18 CD spectroscopy was used to analyze the folding and stability of the P2 variants. While most  
19 mutations had little effect on thermal stability, P38G had two steps of unfolding, the first one  
20 appearing already at 50 °C and the second one only at >75 °C (Figure 6A). Another outlier  
21 was R30Q, which had a slightly lowered stability compared to wtP2. Interestingly, these two  
22 mutations causing changes in stability are those with enhanced membrane binding and  
23 stacking properties. In the crystal structures, they present minor conformational differences in  
24 their helical lid, compared to wtP2.

25 To elucidate the conformational changes induced by membrane binding, SRCD spectra for  
26 wtP2 and some divergent mutants were measured in the presence and absence of DMPC:DPC  
27 bicelles (Figure 6B). For wtP2, bicelle binding induced small changes in the SRCD spectrum.  
28 L27D exhibited less change in the spectrum in the presence of bicelles, supporting the  
29 reduced membrane binding of L27D observed in SPR and turbidity assays. On the other  
30 hand, P38G, having a higher propensity for membrane interactions, showed larger  
31 conformational changes in the bicelle environment. R30Q behaved much like P38G; both  
32 variants showed partial unfolding. These results highlight the importance of protein  
33 flexibility in membrane binding and indicate a role for the  $\alpha$ -helical lid in P2-membrane  
34 interactions.

1 The bicelle system was used to deduce effects of lipid composition on wtP2 folding state, as  
2 well as to compare to vesicles with the same lipid composition. SRCD spectra showed that in  
3 vesicles, both 1:1 and 9:1 DMPC:DMPG gave the same conformational change of wtP2  
4 compared to the protein in water (Figure 6C). In bicelles, however, wtP2 behaved differently,  
5 in that very little change occurred in DMPC alone or in 9:1 DMPC:DMPG, and the spectrum  
6 changed more with 1:1 and 4:1 DMPC:DMPG, to resemble the one measured with vesicles.  
7 (Figure 6D). These differences with respect to lipid composition could be related to  
8 membrane curvature.

### 9 **Atomistic simulations on P2-membrane interactions**

10 To combine aspects of high-resolution structural data and membrane binding, we studied the  
11 interactions of wild-type and P38G P2 with membrane surfaces using atomistic MD  
12 simulations (Figure 7). Two membrane systems were built: a 1:1 mixture of DMPC:DMPG,  
13 which corresponds to compositions often used in the laboratory, and a myelin-like membrane  
14 based on literature values<sup>49</sup>.

15 During the attachment of wtP2 onto the membrane surface, a similar orientation was always  
16 observed: this involved the positively charged surface close to the bottom of the  $\beta$  barrel.  
17 Arg88 is a central residue in initial P2-membrane interactions. While it was expected that  
18 initial membrane binding would involve the portal region and the helical lid, this orientation,  
19 with the bottom face of the  $\beta$  barrel first approaching the membrane, is reproducible. The  
20 protein was further turned on its side in this arrangement in the myelin lipid composition,  
21 indicating that the rows of P2 molecules observed in cryo-EM images do not embed deep into  
22 the bilayers. The 3-nm spacing between membranes can accommodate one layer of P2 in this  
23 orientation.

24 A difference in orientation was observed between the DMPC:DMPG and myelin membranes;  
25 P2 remains more upright and dynamic in DMPC:DMPG, while it falls rigidly on its side on  
26 the myelin-like membrane (Figure 7C). Differences in wtP2 dynamics were additionally  
27 observed between lipid compositions. The protein was more rigid when bound to the myelin  
28 membrane (Figure 7A); on DMPC:DMPG, it had higher dynamics and hung on the  
29 membrane with the Arg88 anchor (Figure 7C). During the simulation with the myelin-like  
30 bilayer, the PIP<sub>2</sub> molecules within the myelin bilayer bound to the tip of the  $\beta$ 5- $\beta$ 6 and  $\beta$ 7- $\beta$ 8  
31 loops, promoting opening of the  $\beta$  barrel, while Arg88 at the other end of the protein, in the  
32  $\beta$ 6- $\beta$ 7 loop, interacted strongly with POPS head groups (Supplementary Figure 1, Figure 7D).  
33 The PIP<sub>2</sub> binding site is formed of the side chains of Arg78, Lys79, and Arg96. These results  
34 could reflect an important difference between a biological membrane composition and  
35 simplistic membrane models.

1 The electrostatic interactions of wtP2 and P38G were very similar with the membrane lipids  
2 during the simulations (Supplementary Figure 1). The P38G variant similarly attached to the  
3 myelin-like membrane surface, being anchored sideways, and opened up even more than  
4 wtP2 (Figure 7B,D). The portal region, and the expected opening during ligand exchange <sup>13</sup>,  
5 face upwards in this setting, and upon the approach of another membrane, they could closely  
6 interact with its surface.

7

8



## 1 **Discussion**

2 Myelin protein P2 is a unique member of the FABP family, able to stack lipid bilayers  
3 together, in addition to being a member of the FABP subgroup carrying out collisional  
4 transfer. Lipid membrane binding by P2 involves the hydrophobic tip of the helical lid,  
5 electrostatic interactions, and dynamics of the portal region<sup>13,15,46</sup>. Here, we have revealed  
6 details of the assembly of the P2-membrane stacks and the surprising role of the bottom  
7 region of the P2  $\beta$  barrel in membrane binding. The data provide much-needed information  
8 on the assembly of the myelin membrane at the molecular level.

### 9 *Structure of P2-induced proteolipid multilayers*

10 Our cryo-EM experiments illustrate an organized lattice-like supramolecular 3-dimensional  
11 arrangement of P2-membrane stacks. Surprisingly, P2, a 15-kDa protein, which has  
12 dimensions of 4.5 nm x 3.6 nm, is visible between the lipid bilayers as a lateral network. Both  
13 the cryo-EM images and calculated 2D class averages of P2-membrane stacks show a  
14 constant distance (3 nm) between the apposing lipid membranes and a repeat distance  
15 (containing a single bilayer and intermembrane space) of 7.5 nm. Earlier, a repeat distance of  
16 ~9 nm for P2-membrane stacks was measured by X-ray diffraction using DMPC:DMPG in  
17 suspension<sup>15</sup>. Bragg peaks in X-ray diffraction experiments support the highly organized  
18 arrangement of P2-membrane stacks seen in cryo-EM, and the conditions for preparing  
19 cryo-EM samples, with less hydration, might be more relevant to myelin *in vivo*. Indeed,  
20 using the bicelle model system, we measured repeat distances of 7.5 nm in stacks of bicelles  
21 induced by P2, and the distance evolved as a function of protein and lipid concentration.  
22 Thus, P2 may have a function in defining the membrane spacing in PNS compact myelin,  
23 together with MBP and P0. All three of these proteins produce membrane stacks *in vitro*<sup>2,3</sup>,  
24 with intermembrane spacing very close to that seen in the mature myelin major dense line.

25 The spacing between the neighboring P2 molecules between membrane bilayers is constant  
26 (~3.5 nm), and there appears to be a relationship between the positioning of P2 molecules  
27 between consecutive membrane layers. The results suggest the presence of a near-crystalline  
28 lattice of P2 between membranes; this is also supported by our X-ray diffraction experiment  
29 using stacked bicelles, in which - unlike earlier similar experiments using lipid vesicles - we  
30 see new distances much shorter than those coming from bilayer stacking *per se*. As these  
31 distances depend on protein concentration, they correspond to distances between proteins  
32 arranged as a lateral layer between two membranes. Whether such packing occurs *in vivo*,  
33 depends on the local P2 concentration in myelin as well as the presence and organization of  
34 other highly abundant myelin proteins, such as P0 and MBP. The quantity of P2 has been  
35 reported to vary between different regions of PNS as well as from nerve fiber to nerve fiber

1 <sup>12</sup>.

2 We recently reported, using similar cryo-EM approaches, the arrangement of the extracellular  
3 domains of P0 as a zipper-like assembly between the membranes <sup>3</sup>. The assembly of P2 at the  
4 cytoplasmic face shown here completes the picture of PNS myelin molecular assembly.  
5 Importantly, while P0 extracellular domains interact with each other as two layers between  
6 membranes, only a single layer of P2 is observed, and each protein molecule must interact  
7 with two cytoplasmic leaflets simultaneously. The details of this aspect were further  
8 characterized here through mutagenesis, functional experiments, and high-end computer  
9 simulations.

#### 10 *Functional residues revealed by point mutations*

11 The unique ability of P2 to stack lipid membranes requires two membrane-binding sites on  
12 opposite faces of the protein; P2 has two positively charged surfaces. Membrane binding  
13 experiments for surface-mutated P2 gave information about crucial regions and mechanisms  
14 of protein-membrane interaction. The L27D mutation at the tip of the  $\alpha$ -helical portal region  
15 reduces membrane stacking and binding, as well as diminishes the changes in CD spectrum  
16 upon introducing membrane-mimetic bicelles. Thus, Leu27 may be inserted into the  
17 hydrophobic core of a lipid bilayer. This insertion is presumably facilitated by a  
18 conformational change in the portal region <sup>15</sup>. In addition, other portal region mutations  
19 (K21Q, K31Q), which remove a positive charge, also decreased membrane binding and  
20 stacking. These residues probably interact with negatively charged lipid head groups and,  
21 together with Leu27, form a membrane anchor of the P2 portal region. We earlier showed  
22 that the L27D mutation impairs the formation of stacked membrane systems in a cell culture  
23 system <sup>15</sup>.

24 On the other hand, the removal of a positive charge at the opposite end of the  $\beta$  barrel  
25 (mutations K45Q, K65S, R88Q and K112Q) caused reduced membrane binding and stacking.  
26 In MD simulations, R88Q protrudes into the lipid membrane and forms tight interactions  
27 with lipid head groups, especially PS in the myelin-like bilayer. However, there are no  
28 hydrophobic residues at the bottom face of P2, and the barrel bottom interaction with the  
29 lipid membrane is facilitated by electrostatic interactions. The bottom region of P2 is unlikely  
30 to be deeply inserted into membranes, nor will it undergo large conformational changes.

31 An exception within all P2 mutants concerns P38G. In line with earlier data <sup>61</sup>, it is more  
32 active in most of the experiments, including membrane stacking as well as membrane, fatty  
33 acid, and cholesterol binding assays. The P38G mutation, however, does not alter the  
34 organization or repeat distance of the P2-membrane stacks in cryo-EM. In the crystal

1 structure of P38G, there is no fatty acid bound, and this mutant is more flexible and has  
2 altered dynamics compared to wtP2<sup>61</sup>. In MD simulations, the fatty acid was observed nearly  
3 escaping from the barrel<sup>13</sup>. The weak electron density of the portal region in the P38G  
4 mutant crystal structure supports the idea of a flexible lid in this mutant, making it more  
5 dynamic<sup>46,62</sup> and prone to opening. The other mutation, R30Q, which increased the  
6 flexibility of the portal region, causes smaller but similar effects on the activity of P2 in  
7 several assays, confirming the importance of the dynamics of the portal region in the function  
8 of P2. For other FABPs, the Arg residue corresponding to P2 Arg30 has been suggested to  
9 attract negatively charged fatty acids<sup>63,64</sup>; while this could be happening in P2 as well, the  
10 R30Q mutation clearly has larger-scale effects on membrane interactions and local folding or  
11 dynamics.

12 Phe57 is a conserved residue within the FABP family suggested to be a general gatekeeper  
13 for ligand binding<sup>13,60</sup>. It controls ligand entry into the  $\beta$  barrel and can flip between two  
14 conformations<sup>13,65</sup>. Phe57 points outwards in the K65Q crystal structure, and the fatty acid  
15 shifts towards the opening cleft. It is unclear how a mutation located at the other end of the  $\beta$   
16 strand might induce the flipping of Phe57. However, the Phe57 flip may be one initial step in  
17 P2 opening, which was observed in MD simulations and structural studies<sup>13,30</sup>.

18 Arg88 appears central to the initial P2-membrane contact, functioning as an anchor. Within  
19 the human FABP family, Arg88 is conserved in P2, but not other family members<sup>15</sup>. This  
20 indicates its possible importance for the membrane stacking function, since other  
21 collision-type FABPs, bind transiently to single membrane surfaces.

## 22 *Conformational changes and dynamics upon membrane binding*

23 The binding of P2 onto a myelin-like membrane is accompanied by a conformational change  
24 opening the likely entry/egress site of the bound fatty acid. This change can be observed both  
25 experimentally and in computer simulations. The change is similar to that observed in  
26 solution for the CMT disease variants and in extended computer simulations of P2<sup>13,30,46</sup>.  
27 Similar conformational changes were observed for H-FABP during long simulations<sup>63</sup>. The  
28 bound ligand could be exchanged with the apposing membrane in a multilayer, when this  
29 conformational change occurs.

30 Atomistic simulations of P2 on a membrane surface revealed different behaviour on a  
31 simplistic model membrane compared to a myelin composition. Importantly, some of the  
32 lipids concentrated on the myelin membrane formed specific interactions with P2 during the  
33 long atomistic simulations, contributing to the conformational change. The presence of two  
34 anchor points for P2 membrane binding enabled the membrane to contribute to P2 barrel

1 opening, unraveling the bound ligand. The negatively charged lipids, PS and PIP<sub>2</sub>, might also  
2 affect other myelin proteins in a specific fashion, and further experiments will be required to  
3 grasp the full scope of intertwined interactions between myelin proteins and specific lipids. A  
4 model combining current data on P2 bound to the cytoplasmic leaflet of myelin is shown in  
5 Figure 8.

6 Upon the formation of a P2-membrane complex, the dynamics of both the protein and lipid  
7 components are altered. When bound to P2, the dynamics of the lipid membrane are  
8 decreased<sup>56</sup>, while P2 becomes extremely heat-stable when bound to membranes<sup>15</sup>. These  
9 observations are likely to be linked to the synergistic effects of P2 and the lipids in the  
10 tightening of the 3D molecular assembly, as shown by X-ray diffraction from  
11 myelin-mimicking bicelle complexes. Furthermore, they are in line with the decreased  
12 dynamics of P2 on a myelin-like membrane in the simulations.

### 13 **Concluding remarks**

14 We have shown that, similarly to P0, MBP, and PMP22, myelin protein P2 is able to  
15 spontaneously induce the formation of myelin-like membrane multilayers. We have for the  
16 first time visualized the arrangement of P2 between membranes, providing an unprecedented  
17 view into the structure of the major dense line in peripheral nerves. Furthermore, our  
18 observations provide a lipid composition-dependent mechanism for the opening of the P2  
19 structure for ligand entry and egress; in the case of a multilayered membrane, the ligand  
20 could be exchanged with the apposing membrane. How myelin proteins act together in  
21 forming native myelin multilayers through interactions at both extracellular and intracellular  
22 surfaces of the bilayer is a major question in myelin biology; the tools and materials exist for  
23 solving this question in the coming years.

24

25

26

1    **Acknowledgements**

2    The authors wish to thank financial support granted by the Academy of Finland, the Emil  
3    Aaltonen Foundation (Finland), Jane and Aatos Erkkö Foundation (Finland), the Helsinki  
4    Institute of Life Science Fellow programme (Finland), the Science and Research Foundation  
5    of the City of Hamburg (Germany), and the Sigrid Jusélius Foundation (Finland). Beamtime  
6    and user support at EMBL/DESY and ISA are gratefully acknowledged. Travel to  
7    synchrotrons was supported by the Norwegian Research Council (SYNKNØYT project  
8    247669) and EU Horizon 2020 programmes iNEXT (grant 653706) and CALIPSOplus (grant  
9    730872).

10

11   **Author contributions**

12   S.R., M.L., I.V., H.S., and P.K. conceived of the study. S.R., O.C.K., J.K., T.N., M.L., A.R.,  
13   V.P.D., and P.K. carried out the experiments. All authors contributed to the interpretation of  
14   the results. S.R. and P.K. took the lead in writing the manuscript. All authors provided critical  
15   feedback and helped shape the research, analysis, and manuscript.

16

1 **Figure legends**

2 **Figure 1. Electron cryomicroscopic analysis of lipid membrane stacking by P2.**

- 3 A. Cryo-EM image of *E. coli* polar lipid liposomes without protein. The images in A and  
4 B are 480x480 nm in size.
- 5 B. The same liposomes in the presence of human P2 make myelin-like multilayered  
6 stacks. Lipid-to-protein mass ratio is 2.0.
- 7 C. The angle between stacked membranes at the edges (pink circles) is nearly constant at  
8  $\sim 60^\circ$ .
- 9 D. 2D class averages of a single P2-linked bilayer stack. Lipid headgroups and proteins  
10 are black. The size of the box is 140x140 pixels (18x18 nm).
- 11 E. Averaged structures of stacked membranes with wild-type and P38G mutant human  
12 P2.
- 13 F. The space between two membranes is enough to fit one layer of P2. The membrane  
14 diameter is 4.5 nm, the space between membranes 3.0 nm, and the distance between  
15 individual P2 molecules 3.5 nm. The crystal structure of a P2 monomer has been  
16 fitted into the assembly.
- 17 G. Averaging of P2-stacked multilayers, including two layers in the analysis, indicates  
18 the lattice-like arrangement of P2 throughout the myelin-like multilayer. Lipid  
19 headgroups and proteins are white; scale bar, 5 nm.

20

21 **Figure 2. Insights into P2 structure between membranes from bicelle complexes.**

- 22 A. Negative staining EM micrograph of P2-stacked bicelles. Scale bar, 100 nm.
- 23 B. Bragg X-ray diffraction peaks from P2-stacked bicelles (black) and vesicles (red).  
24 The corresponding repeat distances are marked.
- 25 C. Titration of protein and lipid concentration in the bicelle samples indicate shorter  
26 distances and higher order when both protein and lipid concentrations increase.
- 27 D. A model of P2 arrangement on the plane of the membrane, based on the peak  
28 positions in (B).

29

30 **Figure 3. Crystal structure analysis of selected P2 mutant variants.**

- 31 A. Stereo view of all mutants analyzed.
- 32 B. Surface electrostatics of human P2 reveal two positively charged faces at opposite  
33 ends of the molecule.
- 34 C. View from the top on the C $\alpha$  traces of all P2 variant crystal structures indicates

- 1 flexibility of helix  $\alpha$ 2 and the  $\beta$ 3- $\beta$ 4 loop.  
2 D. Conformational differences between liganded and unliganded P38G. P38G with  
3 palmitate (PDB entry 4D6B<sup>46</sup>) (grey) is superimposed with the two monomers of  
4 unliganded P38G (light and dark blue).  
5 E. Partial opening of the portal in the K65Q variant (pink), superimposed on the wtP2  
6 structure (PDB entry 4BVM<sup>15</sup>).

7

8 **Figure 4. Assays on P2 variant conformation and function.**

- 9 A. DMPA (grey) and DMPC (white) membrane binding assays by SPR.  
10 B. Turbidity assay with 1:1 DMPC:DMPG vesicles.  
11 C. SDS-PAGE analysis of proteolipid pellets reveals SDS-resistant P2 multimers.  
12 D. Surface electrostatics of the P2 bottom surface in wtP2 (left) and the R88Q mutant  
13 (right).  
14 E. Turbidity assay of wtP2 with DMPC:DMPG vesicles (red) and bicelles (black).

15

16 **Figure 5. Ligand binding by human P2.**

- 17 A. Binding of the fluorescent fatty acid DAUDA.  
18 B. Binding of NBD-cholesterol by wtP2 (black) and P38G (red). Dashed line, ligand  
19 alone; thin line, 10  $\mu$ M P2; thick line, 40  $\mu$ M P2.  
20 C. Concentration dependence of fluorescence at 532 nm.

21

22 **Figure 6. P2 stability and folding.**

- 23 A. Melting curves for wtP2 and all studied mutants. The outliers are P38G (red) and  
24 R30Q (blue). The thick black line represents wtP2.  
25 B. Conformation of wtP2 and selected mutants in the presence (solid lines) and absence  
26 (dotted lines) of DMPC:DPC bicelles.  
27 C. Wild-type P2 in water (red dashed line), 9:1 DMPC:DMPG (thin black line), and 1:1  
28 DMPC:DMPG (thick black line).  
29 D. Wild-type P2 in water (red dashed line), and lipid:DPC bicelles containing DMPC  
30 (black dashed line), 9:1 DMPC:DMPG (thin black line), 4:1 DMPC:DMPG (medium  
31 black line), and 1:1 DMPC:DMPG (thick black line).

32

33 **Figure 7. MD simulations on P2 binding to lipid membrane surface.**

- 1        A. RMSF for wtP2 (black) and P38G (red) in 1:1 DMPC:DMPG (thin lines) and myelin  
2            lipid composition (thick lines).
- 3        B. Distance of the  $\beta$ 4- $\beta$ 5 opening of the  $\beta$  barrel during the simulation. Colouring as in  
4            (A).
- 5        C. Angle of the P2  $\beta$  barrel axis with respect to the membrane surface. Note how both  
6            wtP2 and P38G are rigidly anchored to the same orientation immediately after the  
7            equilibration period.
- 8        D. Snapshots from the simulations. Left: wtP2 on DMPC:DMPG at 1135 ns. Middle:  
9            wtP2 on myelin at 2060 ns. Right: P38G on myelin at 800 ns. Locations of the two  
10            membrane anchors, Arg88 (blue arrowhead) and Arg78/Lys79/Arg96 (magenta  
11            asterisks) are indicated.

12        **Figure 8. Model for P2-membrane interactions based on current data.** Shown is a  
13        superposition of wtP2 crystal structure (blue) and the membrane-bound conformation of  
14        P38G (orange). Upon membrane binding, Arg88 gets anchored by POPS molecules (red) and  
15        the basic residues around the  $\beta$ 5- $\beta$ 6 loop interact strongly with PIP<sub>2</sub> (green). The opening of  
16        the  $\beta$ 5- $\beta$ 6 flap exposes the fatty acid ligand (purple). Leu27, Phe57, and the anion binding  
17        site are facing the apposing membrane surface in this setting.

18

19        **Supplementary Figure 1. Electrostatic interactions between key basic residues and**  
20        **membrane lipids.** Green, PIP<sub>2</sub>; black, POPS; red, cholesterol; blue, POPE; magenta, POPC;  
21        orange, sphingomyelin. Note how Arg78, Lys79, and Arg96 have stable PIP<sub>2</sub> contacts, while  
22        Arg88 has strong interactions with PS, and these interactions are observed for both wtP2 and  
23        P38G.

24



## 1 References

- 2 1. Schmitt, F. O., Bear, R. S. & Clark, G. L. The role of lipoids in the x-ray diffraction  
3 patterns of nerve. *Science* **82**, 44-45 (1935).
- 4 2. Raasakka, A. et al. Membrane Association Landscape of Myelin Basic Protein Portrays  
5 Formation of the Myelin Major Dense Line. *Sci Rep* **7**, 4974 (2017).
- 6 3. Raasakka, A. et al. Molecular structure and function of myelin protein P0 in membrane  
7 stacking. *Sci Rep* **9**, 642 (2019).
- 8 4. Filbin, M. T., Walsh, F. S., Trapp, B. D., Pizzey, J. A. & Tennekoon, G. I. Role of  
9 myelin P0 protein as a homophilic adhesion molecule. *Nature* **344**, 871-872 (1990).
- 10 5. Wong, M. H. & Filbin, M. T. The cytoplasmic domain of the myelin P0 protein  
11 influences the adhesive interactions of its extracellular domain. *J Cell Biol* **126**,  
12 1089-1097 (1994).
- 13 6. Wong, M. H. & Filbin, M. T. Dominant-negative effect on adhesion by myelin Po  
14 protein truncated in its cytoplasmic domain. *J Cell Biol* **134**, 1531-1541 (1996).
- 15 7. Mittendorf, K. F. et al. Peripheral myelin protein 22 alters membrane architecture. *Sci*  
16 *Adv* **3**, e1700220 (2017).
- 17 8. Trapp, B. D., Dubois-Dalcq, M. & Quarles, R. H. Ultrastructural localization of P2  
18 protein in actively myelinating rat Schwann cells. *J Neurochem* **43**, 944-948 (1984).
- 19 9. Lemmon, M. A. Membrane recognition by phospholipid-binding domains. *Nat Rev Mol*  
20 *Cell Biol* **9**, 99-111 (2008).
- 21 10. Gould, R. M. et al. Myelin sheaths are formed with proteins that originated in vertebrate  
22 lineages. *Neuron Glia Biol* **4**, 137-152 (2008).
- 23 11. Belin, S. et al. Neuregulin 1 type III improves peripheral nerve myelination in a mouse  
24 model of congenital hypomyelinating neuropathy. *Hum Mol Genet* (2018).
- 25 12. Trapp, B. D., McIntyre, L. J., Quarles, R. H., Sternberger, N. H. & Webster, H. D.  
26 Immunocytochemical localization of rat peripheral nervous system myelin proteins: P2  
27 protein is not a component of all peripheral nervous system myelin sheaths. *Proc Natl*  
28 *Acad Sci U S A* **76**, 3552-3556 (1979).
- 29 13. Laulumaa, S. et al. Structure and dynamics of a human myelin protein P2 portal region  
30 mutant indicate opening of the  $\beta$  barrel in fatty acid binding proteins. *BMC Struct Biol*  
31 **18**, 8 (2018).
- 32 14. Majava, V. et al. Structural and functional characterization of human peripheral nervous  
33 system myelin protein P2. *PLoS One* **5**, e10300 (2010).
- 34 15. Ruskamo, S. et al. Atomic resolution view into the structure-function relationships of  
35 the human myelin peripheral membrane protein P2. *Acta Crystallogr D Biol Crystallogr*  
36 **70**, 165-176 (2014).
- 37 16. Zenker, J. et al. A role of peripheral myelin protein 2 in lipid homeostasis of  
38 myelinating Schwann cells. *Glia* **62**, 1502-1512 (2014).
- 39 17. Kim, H. K. & Storch, J. Mechanism of free fatty acid transfer from rat heart fatty  
40 acid-binding protein to phospholipid membranes. Evidence for a collisional process. *J*  
41 *Biol Chem* **267**, 20051-20056 (1992).
- 42 18. Storch, J. Diversity of fatty acid-binding protein structure and function: studies with  
43 fluorescent ligands. *Mol Cell Biochem* **123**, 45-53 (1993).
- 44 19. Thumser, A. E. & Storch, J. Liver and intestinal fatty acid-binding proteins obtain fatty  
45 acids from phospholipid membranes by different mechanisms. *J Lipid Res* **41**, 647-656  
46 (2000).
- 47 20. Thumser, A. E., Tsai, J. & Storch, J. Collision-mediated transfer of long-chain fatty  
48 acids by neural tissue fatty acid-binding proteins (FABP): studies with fluorescent  
49 analogs. *J Mol Neurosci* **16**, 143-50; discussion 151 (2001).
- 50 21. Zamarreño, F. et al. Conserved charged amino acids are key determinants for fatty acid  
51 binding proteins (FABPs)-membrane interactions. A multi-methodological  
52 computational approach. *J Biomol Struct Dyn* **36**, 861-877 (2018).

- 1 22. Saher, G. & Stumpf, S. K. Cholesterol in myelin biogenesis and hypomyelinating  
2 disorders. *Biochim Biophys Acta* **1851**, 1083-1094 (2015).
- 3 23. Stettner, M. et al. The Role of Peripheral Myelin Protein 2 in Remyelination. *Cell Mol*  
4 *Neurobiol* **38**, 487-496 (2018).
- 5 24. Graf, S. A. et al. The myelin protein PMP2 is regulated by SOX10 and drives  
6 melanoma cell invasion. *Pigment Cell Melanoma Res* **32**, 424-434 (2019).
- 7 25. Palaima, P. et al. Peripheral myelin protein 2 - a novel cluster of mutations causing  
8 Charcot-Marie-Tooth neuropathy. *Orphanet J Rare Dis* **14**, 197 (2019).
- 9 26. Gonzaga-Jauregui, C. et al. Exome Sequence Analysis Suggests that Genetic Burden  
10 Contributes to Phenotypic Variability and Complex Neuropathy. *Cell Rep* **12**,  
11 1169-1183 (2015).
- 12 27. Hong, Y. B. et al. A Mutation in PMP2 Causes Dominant Demyelinating  
13 Charcot-Marie-Tooth Neuropathy. *PLoS Genet* **12**, e1005829 (2016).
- 14 28. Motley, W. W. et al. De novo PMP2 mutations in families with type 1  
15 Charcot-Marie-Tooth disease. *Brain* **139**, 1649-1656 (2016).
- 16 29. Punetha, J. et al. Identification of a pathogenic PMP2 variant in a multi-generational  
17 family with CMT type 1: Clinical gene panels versus genome-wide approaches to  
18 molecular diagnosis. *Mol Genet Metab* **125**, 302-304 (2018).
- 19 30. Ruskamo, S. et al. Molecular mechanisms of Charcot-Marie-Tooth neuropathy linked to  
20 mutations in human myelin protein P2. *Sci Rep* **7**, 6510 (2017).
- 21 31. Lehtimäki, M., Laulumaa, S., Ruskamo, S. & Kursula, P. Production and crystallization  
22 of a panel of structure-based mutants of the human myelin peripheral membrane protein  
23 P2. *Acta Crystallogr Sect F Struct Biol Cryst Commun* **68**, 1359-1362 (2012).
- 24 32. Li, X. et al. Electron counting and beam-induced motion correction enable  
25 near-atomic-resolution single-particle cryo-EM. *Nat Methods* **10**, 584-590 (2013).
- 26 33. Scherer, S. et al. 2dx\_automator: implementation of a semiautomatic high-throughput  
27 high-resolution cryo-electron crystallography pipeline. *J Struct Biol* **186**, 302-307  
28 (2014).
- 29 34. Tang, G. et al. EMAN2: an extensible image processing suite for electron microscopy. *J*  
30 *Struct Biol* **157**, 38-46 (2007).
- 31 35. Desfosses, A., Ciuffa, R., Gutsche, I. & Sachse, C. SPRING - an image processing  
32 package for single-particle based helical reconstruction from electron cryomicrographs.  
33 *J Struct Biol* **185**, 15-26 (2014).
- 34 36. Blanchet, C. E. et al. Versatile sample environments and automation for biological  
35 solution X-ray scattering experiments at the P12 beamline (PETRA III, DESY). *J Appl*  
36 *Crystallogr* **48**, 431-443 (2015).
- 37 37. Franke, D. et al. ATSAS 2.8: a comprehensive data analysis suite for small-angle  
38 scattering from macromolecular solutions. *J Appl Crystallogr* **50**, 1212-1225 (2017).
- 39 38. Kabsch, W. XDS. *Acta Crystallogr D Biol Crystallogr* **66**, 125-132 (2010).
- 40 39. Kursula, P. XDSi: a graphical interface for the data processing program XDS. *J Appl*  
41 *Crystallogr* **37**, 347-348 (2004).
- 42 40. McCoy, A. J. et al. Phaser crystallographic software. *J Appl Crystallogr* **40**, 658-674  
43 (2007).
- 44 41. Afonine, P. V. et al. Towards automated crystallographic structure refinement with  
45 phenix.refine. *Acta Crystallogr D Biol Crystallogr* **68**, 352-367 (2012).
- 46 42. Emsley, P., Lohkamp, B., Scott, W. G. & Cowtan, K. Features and development of  
47 Coot. *Acta Cryst. D* **66**, 486-501 (2010).
- 48 43. Davis, I. W., Murray, L. W., Richardson, J. S. & Richardson, D. C. MOLPROBITY:  
49 structure validation and all-atom contact analysis for nucleic acids and their complexes.  
50 *Nucleic Acids Res* **32**, W615-9 (2004).
- 51 44. Davies, J. K., Thumser, A. E. & Wilton, D. C. Binding of recombinant rat liver fatty  
52 acid-binding protein to small anionic phospholipid vesicles results in ligand release: a  
53 model for interfacial binding and fatty acid targeting. *Biochemistry* **38**, 16932-16940  
54 (1999).

- 1 45. Patil, R. et al. Characterization of two distinct modes of drug binding to human  
2 intestinal fatty acid binding protein. *ACS Chem Biol* **9**, 2526-2534 (2014).
- 3 46. Laulumaa, S. et al. Dynamics of the Peripheral Membrane Protein P2 from Human  
4 Myelin Measured by Neutron Scattering--A Comparison between Wild-Type Protein  
5 and a Hinge Mutant. *PLoS One* **10**, e0128954 (2015).
- 6 47. Brooks, B. R. et al. CHARMM: the biomolecular simulation program. *J Comput Chem*  
7 **30**, 1545-1614 (2009).
- 8 48. Jo, S., Kim, T., Iyer, V. G. & Im, W. CHARMM-GUI: a web-based graphical user  
9 interface for CHARMM. *J Comput Chem* **29**, 1859-1865 (2008).
- 10 49. Inouye, H. & Kirschner, D. A. Membrane interactions in nerve myelin: II.  
11 Determination of surface charge from biochemical data. *Biophys J* **53**, 247-260 (1988).
- 12 50. Jorgensen, W. L., Chandrasekar, J. & Madura, J. D. Comparison of simple potential  
13 functions for simulating liquid water. *J Chem Phys* **79**, 926-935 (1983).
- 14 51. Bussi, G., Donadio, D. & Parrinello, M. Canonical sampling through velocity rescaling.  
15 *J Chem Phys* **126**, 014101 (2007).
- 16 52. Parrinello, M. & Rahman, A. Polymorphic transitions in single crystals: A new  
17 molecular dynamics method. *Journal of Applied physics* (1981).
- 18 53. Hess, B., Bekker, H., Berendsen, H. J. C. & Fraaije, J. G. E. M. LINCS: A linear  
19 constraint solver for molecular simulations. *J Comput Chem* **18**, 1463-1472 (1997).
- 20 54. Darden, T., York, D. & Pedersen, L. Particle mesh Ewald: An  $N \log(N)$  method for  
21 Ewald sums in large systems. *J Chem Phys* **98**, 10089-10092 (1993).
- 22 55. Hess, B., Kutzner, C., van der Spoel, D. & Lindahl, E. GROMACS 4: Algorithms for  
23 highly efficient, load-balanced, and scalable molecular simulation. *Journal*  
24 *ChemTheory Comput* **4**, 435-447 (2008).
- 25 56. Knoll, W. et al. Dynamic properties of a reconstituted myelin sheath. *Spectroscopy* **24**,  
26 585-592 (2010).
- 27 57. Sedzik, J., Blaurock, A. E. & Hoehli, M. Reconstituted P2/myelin-lipid multilayers. *J*  
28 *Neurochem* **45**, 844-852 (1985).
- 29 58. Suresh, S., Wang, C., Nanekar, R., Kursula, P. & Edwardson, J. M. Myelin basic  
30 protein and myelin protein 2 act synergistically to cause stacking of lipid bilayers.  
31 *Biochemistry* **49**, 3456-3463 (2010).
- 32 59. Laulumaa, S. & Kursula, P. Sub-Atomic Resolution Crystal Structures Reveal  
33 Conserved Geometric Outliers at Functional Sites. *Molecules* **24**, (2019).
- 34 60. Simpson, M. A. & Bernlohr, D. A. Analysis of a series of phenylalanine 57 mutants of  
35 the adipocyte lipid-binding protein. *Biochemistry* **37**, 10980-10986 (1998).
- 36 61. Laulumaa, S. et al. Production, crystallization and neutron diffraction of fully  
37 deuterated human myelin peripheral membrane protein P2. *Acta Crystallogr F Struct*  
38 *Biol Commun* **71**, 1391-1395 (2015).
- 39 62. Laulumaa, S., Koza, M. M., Seydel, T., Kursula, P. & Natali, F. A Quasielastic Neutron  
40 Scattering Investigation on the Molecular Self-Dynamics of Human Myelin Protein P2.  
41 *J Phys Chem B* **123**, 8178-8185 (2019).
- 42 63. Guo, Y., Duan, M. & Yang, M. The Observation of Ligand-Binding-Relevant Open  
43 States of Fatty Acid Binding Protein by Molecular Dynamics Simulations and a Markov  
44 State Model. *Int J Mol Sci* **20**, (2019).
- 45 64. Young, A. C. et al. Structural studies on human muscle fatty acid binding protein at 1.4  
46 Å resolution: binding interactions with three C18 fatty acids. *Structure* **2**, 523-534  
47 (1994).
- 48 65. Jones, T. A., Bergfors, T., Sedzik, J. & Unge, T. The three-dimensional structure of P2  
49 myelin protein. *EMBO J* **7**, 1597-1604 (1988).

50

51

A

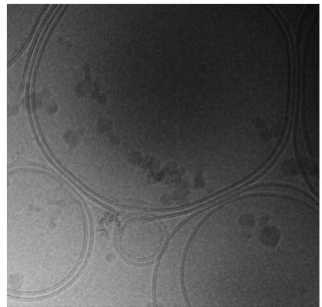

B

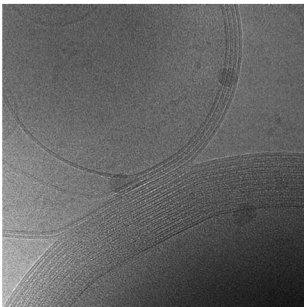

C

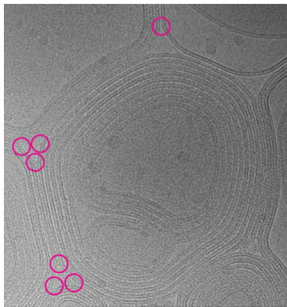

D

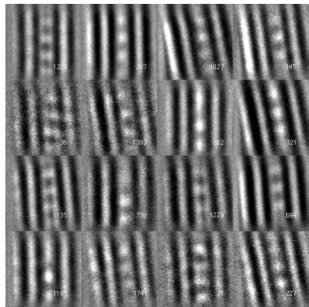

E

wtP2

P38G

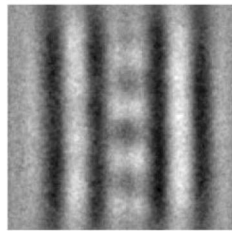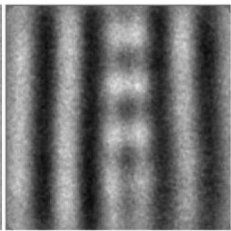

F

4.5 3.0 4.5

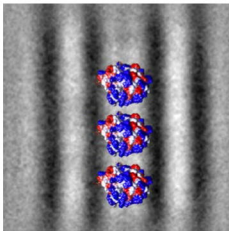

G

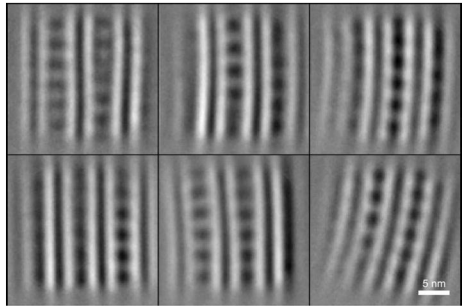

**A**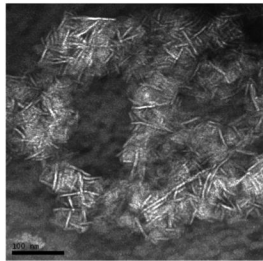**B**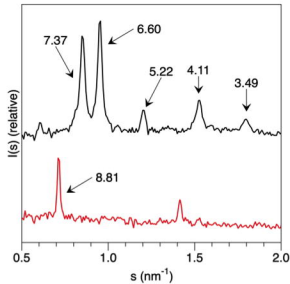**C**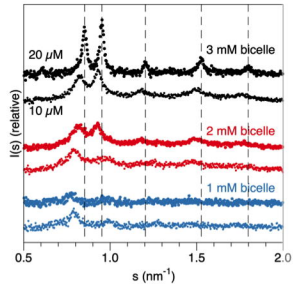**D**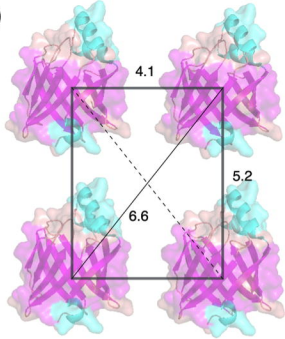

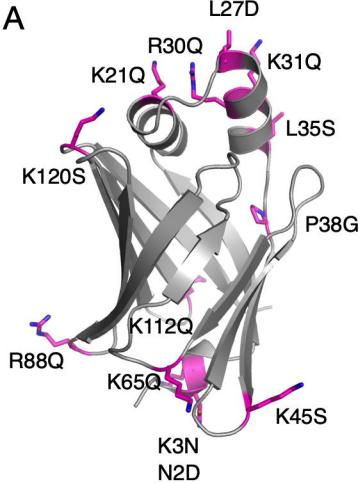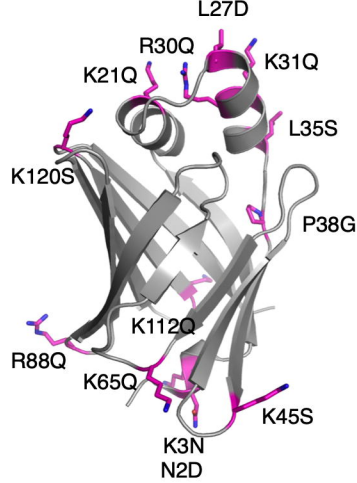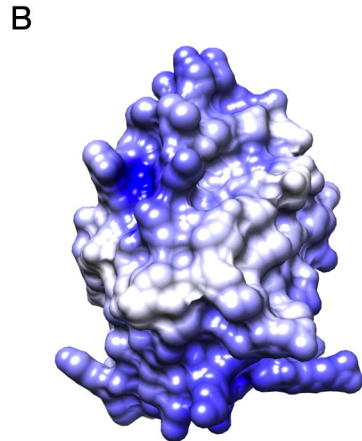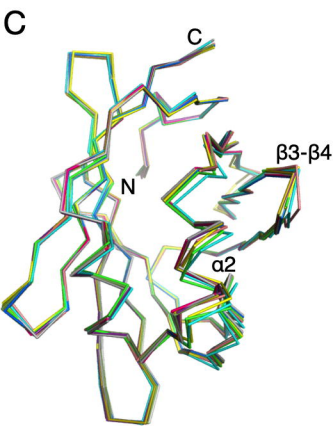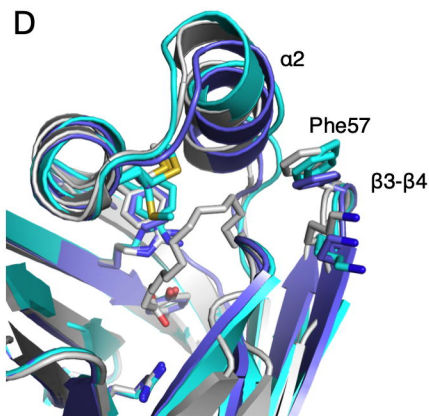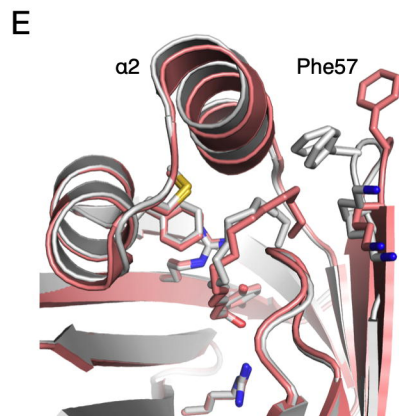

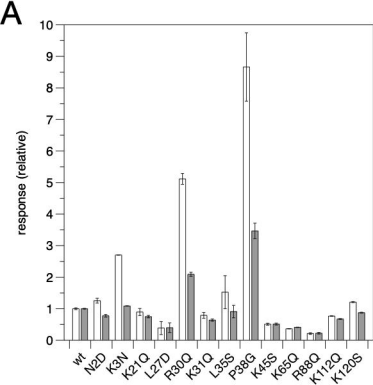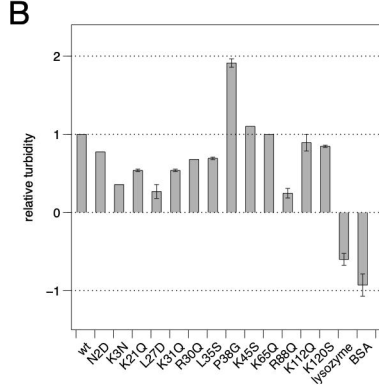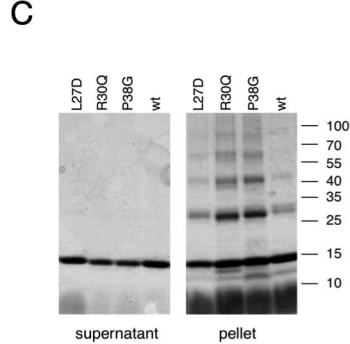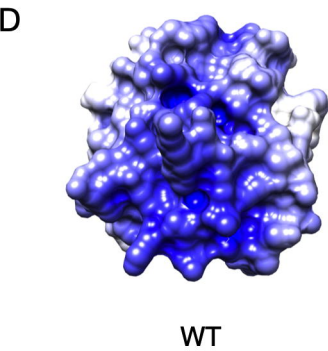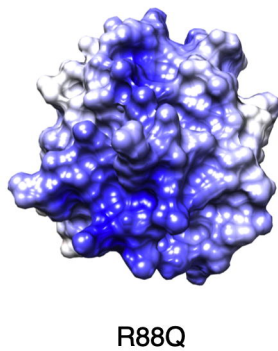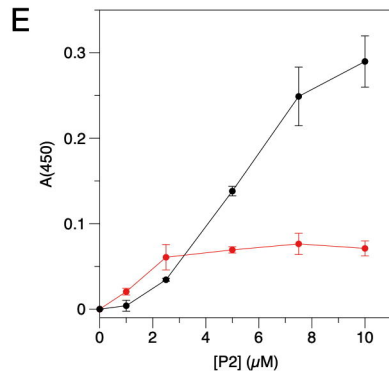

**A**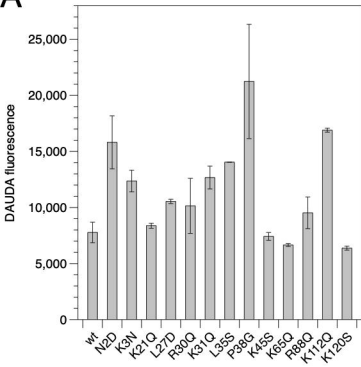**B**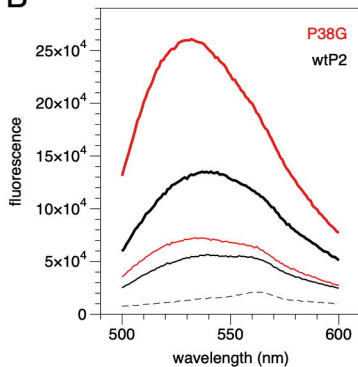**C**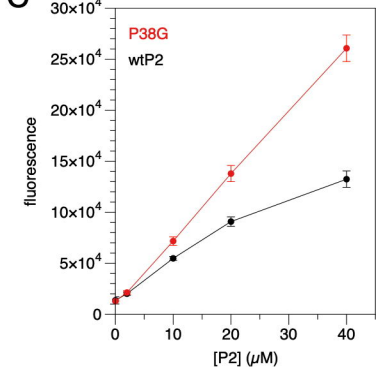



**A**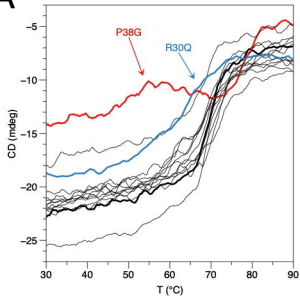**B**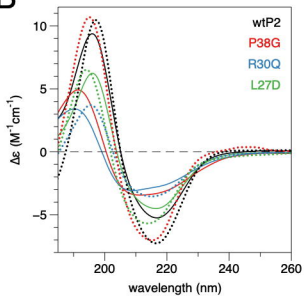**C**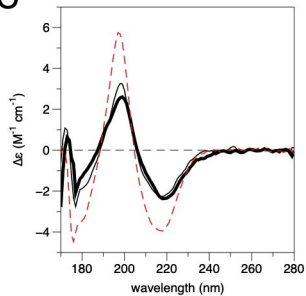**D**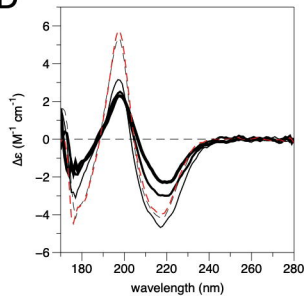

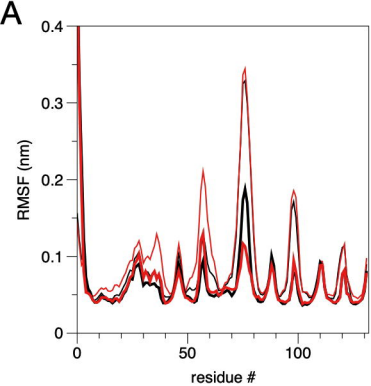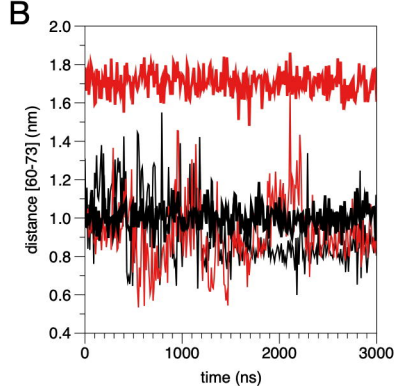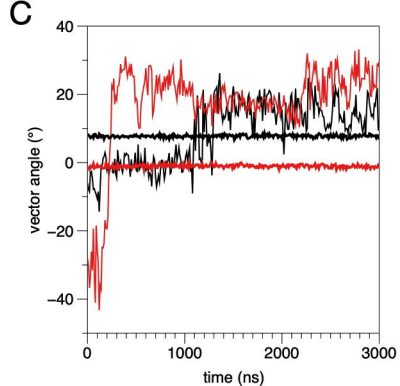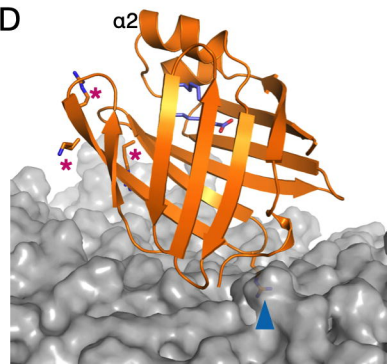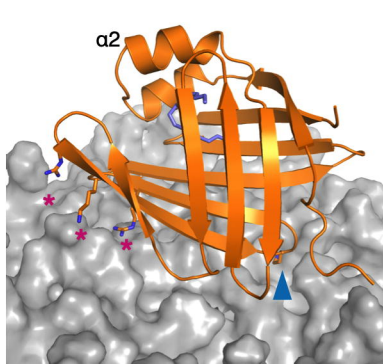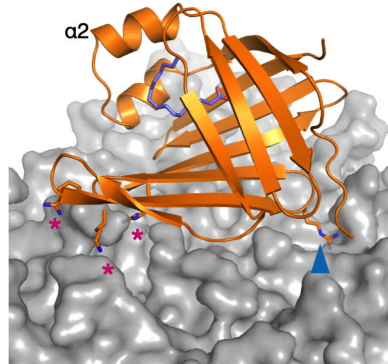

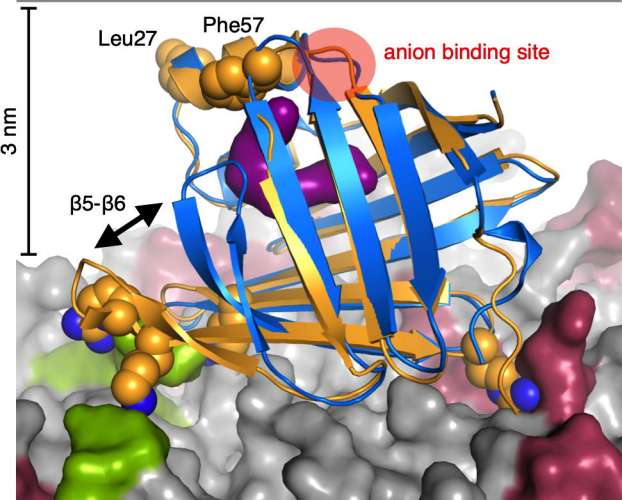

Source: https://www.biorxiv.org/content/10.1101/2020.02.06.937177v1.full.pdf
